# Supplementary material for: Present status of hybrid materials for potable water decontamination: a review
Source: Royal Society of Chemistry journal article supplement (doi:10.1039/d0ew00619j), 2020-01-01
Supplement: d0ew00619j1.pdf [file d0ew00619j1.pdf]

## Electronic supplementary material

### Environmental Science: Water Research & Technology

#### Present status of hybrid material for potable water decontamination: A Review

Hirakendu Basu <sup>a,\*</sup>, Sudeshna Saha <sup>a</sup>, Suresh Kumar Kailasa <sup>b</sup>, Rakesh Kumar Singhal <sup>a</sup>

<sup>a</sup> Analytical Chemistry Division, Bhabha Atomic Research Centre, Trombay, Mumbai, 400085, India

<sup>b</sup> Department of Applied Chemistry, S. V. National Institute of Technology, Surat, 395007, Gujarat, India

E mail: \*[hirak@barc.gov.in](mailto:hirak@barc.gov.in) ;Tel:91-22-25590312 fax No 91-22-25505151

#### Effect of pH and zeta potential on uptake of uranium using TiO<sub>2</sub> microspheres:

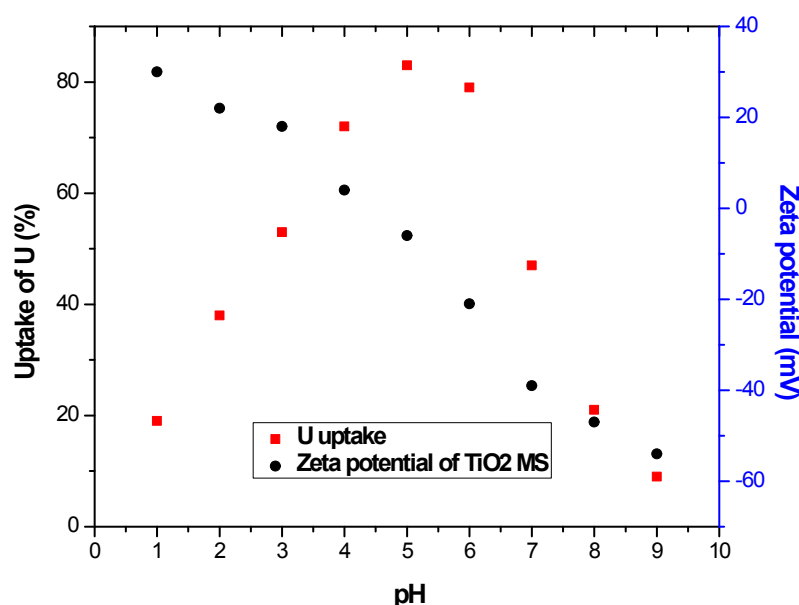

Fig. S1: % Uptake of U as a function of pH and zeta potential (Reprinted with permission from Ref. no. 302, Copyright 2020 Royal Society of Chemistry)

Percentage uptake of uranium was studied at different pH (1-10), keeping contact time 24 h; uranium concentration 100  $\mu\text{g mL}^{-1}$  and Cal-Alg-TiO<sub>2</sub> MS beads as 10  $\text{mg mL}^{-1}$ . Experimental findings showed that uranium removal is highly dependent on pH (Fig. S1) with maximum sorption occurring around pH 5.0. The phenomenon can be explained based on the zeta potential of TiO<sub>2</sub> microspheres and species of uranium present at a particular pH. The zeta

potential which is the measure of surface charge on TiO<sub>2</sub> microspheres is positive below pH 4 (point of zero charge or PZC) and negative above pH 4. Now uranium is present as UO<sub>2</sub><sup>2+</sup> (uranyl ion) in acidic medium (pH 2-5). As pH increases beyond 5, uranyl ions get hydrolyzed. At higher pH > 5 Hydrolyzed species of uranium like [(UO<sub>2</sub>)<sub>3</sub>(OH)<sub>5</sub>]<sup>+</sup>, [(UO<sub>2</sub>)<sub>2</sub>(OH)<sub>2</sub>]<sup>2+</sup> and their polymeric species are predominant. Many of these species are negatively charged, some positive and few are neutral. At extreme pH values (pH 8-10) negatively charged species of uranium will dominate. pH 5-6 was therefore the favourable window where TiO<sub>2</sub> microspheres and uranium species are oppositely charged to get sorbed onto the surface making sorption favourable at pH 5-6. At highly acidic pH (1-2) there will be a competition between hydronium (H<sub>3</sub>O<sup>+</sup>) and uranyl (UO<sub>2</sub><sup>2+</sup>) ions.

#### Water quality parameters:

This table (Table S1) provides the maximum allowable limits of various water quality parameters in drinking water as prescribed by WHO.

**Table S1:** Limit of water quality parameters in potable water as per WHO guidelines

| Sl. No                                                  | Parameter                                    | Maximum allowable concentration |
|---------------------------------------------------------|----------------------------------------------|---------------------------------|
| 1                                                       | Colour                                       | 15 True Colour Units            |
| 2                                                       | Turbidity                                    | 5.0 NTU                         |
| 3                                                       | pH                                           | 6.5-8.5                         |
| 4                                                       | Total Hardness (as CaCO <sub>3</sub> )       | 500 mg L <sup>-1</sup>          |
| 5                                                       | Chlorides (as Cl)                            | 250 mg L <sup>-1</sup>          |
| 6                                                       | Dissolved Solids                             | 1000 mg L <sup>-1</sup>         |
| 7                                                       | Sulphate (as SO <sub>4</sub> <sup>2-</sup> ) | 400 mg L <sup>-1</sup>          |
| 8                                                       | Nitrate (as NO <sub>3</sub> <sup>+</sup> )   | 10 mg L <sup>-1</sup>           |
| 9                                                       | Flouride (as F <sup>-</sup> )                | 1.5 mg L <sup>-1</sup>          |
| <b>Micro Pollutants (Heavy Metals &amp; Pesticides)</b> |                                              |                                 |
| 10                                                      | Zinc (as Zn)                                 | 5.0 mg L <sup>-1</sup>          |
| 11                                                      | Iron (as Fe)                                 | 0.3 mg L <sup>-1</sup>          |
| 12                                                      | Manganese (as Mn)                            | 0.1 mg L <sup>-1</sup>          |
| 13                                                      | Copper (as Cu)                               | 1.0 mg L <sup>-1</sup>          |
| 14                                                      | Arsenic (as As)                              | 0.01 mg L <sup>-1</sup>         |
| 15                                                      | Cyanide (as CN)                              | 0.1 mg L <sup>-1</sup>          |
| 16                                                      | Lead (as Pb)                                 | 0.05 mg L <sup>-1</sup>         |

|                      |                                 |                          |
|----------------------|---------------------------------|--------------------------|
| 17                   | Chromium (as Cr <sup>6+</sup> ) | 0.05 mg L <sup>-1</sup>  |
| 18                   | Aluminium (as Al)               | 0.2 mg L <sup>-1</sup>   |
| 19                   | Cadmium (as Cd)                 | 0.005 mg L <sup>-1</sup> |
| 20                   | Selenium (as Se)                | 0.01 mg L <sup>-1</sup>  |
| 21                   | Mercury (as Hg)                 | 0.001 mg L <sup>-1</sup> |
| 22                   | Sodium (as Na)                  | 200 µg L <sup>-1</sup>   |
| 23                   | Uranium                         | 17 µg L <sup>-1</sup>    |
| 24                   | Aldrin & dieldrin               | 0.03 µg L <sup>-1</sup>  |
| 25                   | DDT                             | 1.0 µg L <sup>-1</sup>   |
| 26                   | Benzene                         | 10.0 µg L <sup>-1</sup>  |
| 27                   | Hexachlorobenzene               | 0.01 µg L <sup>-1</sup>  |
| 28                   | Pentachlorophenol               | 10.0 µg L <sup>-1</sup>  |
| <b>Radionuclides</b> |                                 |                          |
| 29                   | Alpha emitters                  | 0.1 Bq L <sup>-1</sup>   |
| 30                   | Beta emitters                   | 1.0 Bq L <sup>-1</sup>   |
